# Supplementary material for: MALDI-ion mobility mass spectrometry of lipids in negative ion mode
Source: Royal Society of Chemistry journal article supplement (doi:10.1039/c4ay00320a), 2014-01-01
Supplement: c4ay00320a1.pdf [file c4ay00320a1.pdf]

**Table for Figure 2b**

| Egg PAs      |        |                          | Egg PGs               |        |                          | Liver PIs  |        |                          |
|--------------|--------|--------------------------|-----------------------|--------|--------------------------|------------|--------|--------------------------|
| Assignment   | m/z    | Mobility Time ( $\mu$ s) | Assignment            | m/z    | Mobility Time ( $\mu$ s) | Assignment | m/z    | Mobility Time ( $\mu$ s) |
| PA 34:2-H    | 671.71 | 413.23                   | PG 34:2-H             | 745.71 | 435.86                   | PI 36:3-H  | 859.92 | 474.16                   |
| PA 34:1-H    | 673.71 | 415.65                   | PG 34:1-H             | 747.72 | 438.61                   | PI 36:2-H  | 861.85 | 479.77                   |
| PA 36:2-H    | 699.78 | 423.53                   | PG 36:4-H             | 769.75 | 443.49                   | PI 36:1-H  | 863.92 | 483.97                   |
| PA 36:1-H    | 701.76 | 425.37                   | PG 36:3-H             | 771.75 | 443.31                   | PI 38:5-H  | 883.93 | 484.64                   |
| PA 38:6-H    | 719.65 | 424.70                   | PG 36:2-H             | 773.78 | 447.03                   | PI 38:4-H  | 885.81 | 487.55                   |
| PA 38:5-H    | 721.77 | 425.81                   | PG 36:1-H             | 775.81 | 449.43                   | PI 38:3-H  | 887.91 | 489.49                   |
| PA 38:4-H    | 723.74 | 428.89                   | PG 38:6-H             | 793.71 | 448.18                   | PI 40:5-H  | 911.95 | 493.61                   |
|              |        |                          | PG 38:5-H             | 795.74 | 449.92                   | PI 40:4-H  | 913.92 | 495.09                   |
|              |        |                          | PG 38:4-H             | 797.82 | 452.92                   | PI 36:3-H  | 859.92 | 474.16                   |
| Brain PSs    |        |                          | Brain STs             |        |                          |            |        |                          |
| Assignment   | m/z    | Mobility Time ( $\mu$ s) | Assignment            | m/z    | Mobility Time ( $\mu$ s) |            |        |                          |
| PS 36:2-H-87 | 699.76 | 422.53                   | ST C18:0/d18:1-H      | 806.82 | 459.78                   |            |        |                          |
| PS 36:1-H-87 | 701.73 | 425.92                   | ST C18:0 (OH)/d18:1-H | 822.85 | 461.58                   |            |        |                          |
| PS 40:6-H-87 | 747.73 | 435.02                   | ST C20:0/d18:1-H      | 834.86 | 466.42                   |            |        |                          |
| PS 40:5-H-87 | 749.83 | 441.25                   | ST C20:0 (OH)/d18:1-H | 850.86 | 469.69                   |            |        |                          |
| PS 36:2-H    | 786.86 | 451.91                   | ST C22:1/d18:1-H      | 860.86 | 475.69                   |            |        |                          |
| PS 36:1-H    | 788.75 | 453.85                   | ST C22:0/d18:1-H      | 862.89 | 478.81                   |            |        |                          |
| PS 36:0-H    | 790.86 | 455.29                   | ST C22:1 (OH)/d18:1-H | 876.87 | 482.00                   |            |        |                          |
| PS 38:4-H    | 810.85 | 458.94                   | ST C22:0 (OH)/d18:1-H | 878.86 | 482.31                   |            |        |                          |
| PS 38:2-H    | 814.89 | 461.69                   | ST C24:1/d18:1-H      | 888.79 | 491.30                   |            |        |                          |
| PS 38:1-H    | 816.88 | 463.02                   | ST C24:0/d18:1-H      | 890.89 | 492.18                   |            |        |                          |
| PS 40:6-H    | 834.81 | 465.72                   | ST C24:1 (OH)/d18:1-H | 904.83 | 489.92                   |            |        |                          |
| PS 40:5-H    | 836.80 | 469.22                   | ST C24:0 (OH)/d18:1-H | 906.87 | 494.33                   |            |        |                          |
